# Supplementary material for: Learning Oncogenetic Networks by Reducing to Mixed Integer Linear Programming
Source: PubMed Central journal article supplement (PMC3683041; doi:10.1371/journal.pone.0065773), 2013-06-14
Supplement: pone.0065773.s003.pdf [file pone.0065773.s003.pdf]

| $V^a$ | $S^b$ | Generator <sup>c</sup> | MPN <sup>d</sup> | SMPN <sup>e</sup> | General <sup>f</sup> | $F_{MPN}^g$ | $F_{SMPN}^h$ | $F_{General}^i$ |
|-------|-------|------------------------|------------------|-------------------|----------------------|-------------|--------------|-----------------|
| 10    | 500   | General                | 23.36            | 23.36             | 46.68                | 69.12       | 69.12        | 48              |
| 10    | 500   | MPN                    | 78.73            | 78.73             | 59.27                | 20.01       | 20.01        | 40.6            |
| 10    | 500   | SMPN                   | 89.87            | 89.87             | 66.5                 | 9.14        | 9.14         | 33.72           |
| 10    | 2000  | General                | 26.65            | 26.65             | 54.93                | 65.77       | 65.77        | 41.76           |
| 10    | 2000  | MPN                    | 93.76            | 93.76             | 70.47                | 5.59        | 5.59         | 29.58           |
| 10    | 2000  | SMPN                   | 96.52            | 96.52             | 66.3                 | 3.21        | 3.21         | 33.84           |
| 10    | 10000 | General                | 26.62            | 26.62             | 60.05                | 66.31       | 66.31        | 38.25           |
| 10    | 10000 | MPN                    | 96.26            | 96.26             | 70.35                | 3.74        | 3.74         | 29.85           |
| 10    | 10000 | SMPN                   | 97.59            | 97.59             | 73.28                | 2.41        | 2.41         | 27.01           |
| 20    | 500   | General                | 23.08            | 23.08             | 54.78                | 69.46       | 69.46        | 41.98           |
| 20    | 500   | MPN                    | 85.61            | 85.38             | 65.74                | 13.23       | 13.46        | 34.72           |
| 20    | 500   | SMPN                   | 89.9             | 89.9              | 73.29                | 8.84        | 8.84         | 26.99           |
| 20    | 2000  | General                | 25.85            | 25.85             | 66.47                | 66.55       | 66.55        | 31.04           |
| 20    | 2000  | MPN                    | 95.1             | 95.1              | 73.63                | 4.55        | 4.55         | 26.64           |
| 20    | 2000  | SMPN                   | 96.15            | 96.15             | 76.74                | 3.31        | 3.31         | 23.52           |
| 20    | 10000 | General                | 26.28            | 26.28             | 73.23                | 66          | 66           | 25.57           |
| 20    | 10000 | MPN                    | 98.22            | 98.22             | 75.86                | 1.72        | 1.72         | 24.3            |
| 20    | 10000 | SMPN                   | 97.51            | 97.51             | 79.64                | 2.39        | 2.39         | 20.82           |
| 30    | 500   | General                | 20.96            | 20.96             | 55.04                | 71.53       | 71.53        | 42.21           |
| 30    | 500   | MPN                    | 83.25            | 82.57             | 70.5                 | 15.65       | 16.36        | 30.39           |
| 30    | 500   | SMPN                   | 92.99            | 92.99             | 75.23                | 6.07        | 6.07         | 26.55           |
| 30    | 2000  | General                | 24.6             | 24.6              | 65.95                | 67.18       | 67.18        | 31.73           |
| 30    | 2000  | MPN                    | 95.82            | 95.58             | 78.28                | 3.79        | 3.99         | 22.4            |
| 30    | 2000  | SMPN                   | 96.66            | 96.66             | 80.62                | 3.02        | 3.02         | 20.15           |
| 30    | 10000 | General                | 25.92            | 25.92             | 74.66                | 65.75       | 65.75        | 23.87           |
| 30    | 10000 | MPN                    | 98.72            | 98.72             | 78.04                | 1.28        | 1.28         | 22.57           |
| 30    | 10000 | SMPN                   | 97.64            | 97.64             | 81.51                | 2.21        | 2.21         | 18.84           |

Table S 1: Performance of the algorithm with synthetic data for k=2

<sup>a</sup> Vertex number

<sup>b</sup> Sample size

<sup>c</sup> Type of generator

<sup>d</sup> Percentage of learned edges with MPN variation of the algorithm

<sup>e</sup> Percentage of learned edges with SMPN variation of the algorithm

<sup>f</sup> Percentage of learned edges with General variation of the algorithm

<sup>g</sup> Value of parameter  $F$  for the MPN variation of the algorithm

<sup>h</sup> Value of parameter  $F$  for the SMPN variation of the algorithm

<sup>i</sup> Value of parameter  $F$  for the General variation of the algorithm
