# Supplementary material for: Learning Oncogenetic Networks by Reducing to Mixed Integer Linear Programming
Source: PubMed Central journal article supplement (PMC3683041; doi:10.1371/journal.pone.0065773), 2013-06-14
Supplement: pone.0065773.s004.pdf [file pone.0065773.s004.pdf]

| $V^a$ | $S^b$ | Generator $c$ | MPN $d$ | SMPN $e$ | General $f$ | $F_{MPN}^g$ | $F_{SMPN}^h$ | $F_{General}^i$ |
|-------|-------|---------------|---------|----------|-------------|-------------|--------------|-----------------|
| 10    | 500   | General       | 21.95   | 32.85    | 53.55       | 70.76       | 64.06        | 41.33           |
| 10    | 500   | MPN           | 70.38   | 69.06    | 46.91       | 23.35       | 25.71        | 50.97           |
| 10    | 500   | SMPN          | 64.34   | 68.09    | 60.04       | 29.14       | 33.16        | 38.19           |
| 10    | 2000  | General       | 23.82   | 40.11    | 66.64       | 69.38       | 60.28        | 30.1            |
| 10    | 2000  | MPN           | 88.54   | 84.55    | 60.45       | 8.19        | 13.24        | 37.89           |
| 10    | 2000  | SMPN          | 77.5    | 75.36    | 69.68       | 19.15       | 30.06        | 29.13           |
| 10    | 10000 | General       | 24.44   | 42.2     | 71.9        | 69.27       | 60.08        | 26.05           |
| 10    | 10000 | MPN           | 94.94   | 92.75    | 72.97       | 4.62        | 7.21         | 26.68           |
| 10    | 10000 | SMPN          | 82.57   | 83.65    | 75.06       | 15.41       | 23.81        | 24.43           |
| 20    | 500   | General       | 20.33   | 35.09    | 54.19       | 72.1        | 62.11        | 41.32           |
| 20    | 500   | MPN           | 75.54   | 64.17    | 59.87       | 19.83       | 35.09        | 39.06           |
| 20    | 500   | SMPN          | 65.68   | 70.88    | 66.92       | 27.38       | 31.79        | 33.03           |
| 20    | 2000  | General       | 22.94   | 44.32    | 63.94       | 69.5        | 56.6         | 33.23           |
| 20    | 2000  | MPN           | 91.45   | 78.97    | 72.6        | 6.6         | 23.07        | 28.96           |
| 20    | 2000  | SMPN          | 78.03   | 82.31    | 76.55       | 18.17       | 23.53        | 24.74           |
| 20    | 10000 | General       | 24.53   | 50.61    | 66.36       | 68.3        | 52.87        | 33.57           |
| 20    | 10000 | MPN           | 95.36   | 86.41    | 81.1        | 4.25        | 16.4         | 20.71           |
| 20    | 10000 | SMPN          | 85.47   | 87.13    | 82.36       | 12.37       | 20.36        | 19.73           |
| 30    | 500   | General       | 21.69   | 39.83    | 55.71       | 70.24       | 58.1         | 41.13           |
| 30    | 500   | MPN           | 74.53   | 61.88    | 60.65       | 22.24       | 39.4         | 40.68           |
| 30    | 500   | SMPN          | 69.56   | 69.8     | 67.3        | 34.01       | 23.72        | 34.25           |
| 30    | 2000  | General       | 22.99   | 46.13    | 67.24       | 69.53       | 55.19        | 31.63           |
| 30    | 2000  | MPN           | 89.64   | 73.31    | 71.29       | 9.69        | 30.91        | 32.65           |
| 30    | 2000  | SMPN          | 77.24   | 81.57    | 74          | 28.88       | 15.05        | 29.29           |
| 30    | 10000 | General       | 24.96   | 50.31    | 65.87       | 67.59       | 52.72        | 35.64           |
| 30    | 10000 | MPN           | 92.51   | 73.59    | 70.59       | 7.82        | 32.03        | 34.81           |
| 30    | 10000 | SMPN          | 76.04   | 88.29    | 76.38       | 31.09       | 10.32        | 27.61           |

Table S 2: Performance of the algorithm with synthetic data for  $k=3$

$a$  Vertex number

$b$  Sample size

$c$  Type of generator

$d$  Percentage of learned edges with MPN variation of the algorithm

$e$  Percentage of learned edges with SMPN variation of the algorithm

$f$  Percentage of learned edges with General variation of the algorithm

$g$  Value of parameter  $F$  for the MPN variation of the algorithm

$h$  Value of parameter  $F$  for the SMPN variation of the algorithm

$i$  Value of parameter  $F$  for the General variation of the algorithm
