# Supplementary material for: Learning Oncogenetic Networks by Reducing to Mixed Integer Linear Programming
Source: PubMed Central journal article supplement (PMC3683041; doi:10.1371/journal.pone.0065773), 2013-06-14
Supplement: pone.0065773.s005.pdf [file pone.0065773.s005.pdf]

| $V^a$ | $S^b$ | Generator $c$ | $MPN_{FDR}^d$ | $MPN_{FNR}^e$ | $SMPN_{FDR}^f$ | $SMPN_{FNR}^g$ | $G_{FDR}^h$ | $G_{FNR}^i$ |
|-------|-------|---------------|---------------|---------------|----------------|----------------|-------------|-------------|
| 10    | 500   | General       | 46.73         | 76.64         | 46.73          | 76.64          | 39.11       | 53.32       |
| 10    | 500   | MPN           | 17.31         | 21.27         | 17.31          | 21.27          | 39.98       | 40.73       |
| 10    | 500   | SMPN          | 7.53          | 10.13         | 7.53           | 10.13          | 33.7        | 33.5        |
| 10    | 2000  | General       | 47.5          | 73.35         | 47.5           | 73.35          | 36.97       | 45.07       |
| 10    | 2000  | MPN           | 4.2           | 6.24          | 4.2            | 6.24           | 29.56       | 29.53       |
| 10    | 2000  | SMPN          | 2.81          | 3.48          | 2.81           | 3.48           | 33.84       | 33.7        |
| 10    | 10000 | General       | 51.67         | 73.38         | 51.67          | 73.38          | 36.08       | 39.95       |
| 10    | 10000 | MPN           | 3.74          | 3.74          | 3.74           | 3.74           | 30.02       | 29.65       |
| 10    | 10000 | SMPN          | 2.41          | 2.41          | 2.41           | 2.41           | 27.26       | 26.72       |
| 20    | 500   | General       | 53.4          | 76.92         | 53.4           | 76.92          | 37.8        | 45.22       |
| 20    | 500   | MPN           | 11.87         | 14.39         | 12.1           | 14.62          | 33.06       | 34.26       |
| 20    | 500   | SMPN          | 7.23          | 10.1          | 7.23           | 10.1           | 27.11       | 26.71       |
| 20    | 2000  | General       | 51.16         | 74.15         | 51.16          | 74.15          | 27.98       | 33.53       |
| 20    | 2000  | MPN           | 4.14          | 4.9           | 4.14           | 4.9            | 26.81       | 26.37       |
| 20    | 2000  | SMPN          | 2.63          | 3.85          | 2.63           | 3.85           | 23.68       | 23.26       |
| 20    | 10000 | General       | 50.34         | 73.72         | 50.34          | 73.72          | 24.21       | 26.77       |
| 20    | 10000 | MPN           | 1.66          | 1.78          | 1.66           | 1.78           | 24.45       | 24.14       |
| 20    | 10000 | SMPN          | 2.28          | 2.49          | 2.28           | 2.49           | 21.23       | 20.36       |
| 30    | 500   | General       | 54.91         | 79.04         | 54.91          | 79.04          | 38.81       | 44.96       |
| 30    | 500   | MPN           | 14.4          | 16.75         | 13.14          | 17.43          | 31.16       | 29.5        |
| 30    | 500   | SMPN          | 5             | 7.01          | 5              | 7.01           | 28.18       | 24.77       |
| 30    | 2000  | General       | 50.07         | 75.4          | 50.07          | 75.4           | 28.95       | 34.05       |
| 30    | 2000  | MPN           | 3.35          | 4.18          | 3.52           | 4.42           | 23.04       | 21.72       |
| 30    | 2000  | SMPN          | 2.68          | 3.34          | 2.68           | 3.34           | 20.84       | 19.38       |
| 30    | 10000 | General       | 48.73         | 74.08         | 48.73          | 74.08          | 22.26       | 25.34       |
| 30    | 10000 | MPN           | 1.28          | 1.28          | 1.28           | 1.28           | 23.14       | 21.96       |
| 30    | 10000 | SMPN          | 2.05          | 2.36          | 2.05           | 2.36           | 19.16       | 18.49       |

Table S 3: False positive and false negative values for synthetic data with  $k = 2$

<sup>a</sup> Vertex number

<sup>b</sup> Sample size

<sup>c</sup> Type of generator

<sup>d</sup> Value of  $FDR$  from the MPN variation of DiProg

<sup>e</sup> Value of  $FNR$  from the MPN variation of DiProg

<sup>f</sup> Value of  $FDR$  from the SMPN variation of DiProg

<sup>g</sup> Value of  $FNR$  from the SMPN variation of DiProg

<sup>h</sup> Value of  $FDR$  from the General variation of DiProg

<sup>i</sup> Value of  $FNR$  from the General variation of DiProg
