# Supplementary material for: Learning Oncogenetic Networks by Reducing to Mixed Integer Linear Programming
Source: PubMed Central journal article supplement (PMC3683041; doi:10.1371/journal.pone.0065773), 2013-06-14
Supplement: pone.0065773.s006.pdf [file pone.0065773.s006.pdf]

| $V^a$ | $S^b$ | Generator $c$ | $MPN_{FDR}^d$ | $MPN_{FNR}^e$ | $SMPN_{FDR}^f$ | $SMPN_{FNR}^g$ | $G_{FDR}^h$ | $G_{FNR}^i$ |
|-------|-------|---------------|---------------|---------------|----------------|----------------|-------------|-------------|
| 10    | 500   | General       | 51.2          | 78.05         | 58.97          | 67.15          | 33.91       | 46.45       |
| 10    | 500   | MPN           | 14.72         | 29.62         | 18.33          | 30.94          | 47.83       | 53.09       |
| 10    | 500   | SMPN          | 20.09         | 35.66         | 33.83          | 31.91          | 35.74       | 39.96       |
| 10    | 2000  | General       | 55.54         | 76.18         | 59.47          | 59.89          | 24.4        | 33.36       |
| 10    | 2000  | MPN           | 4.05          | 11.46         | 10.29          | 15.45          | 31.31       | 39.55       |
| 10    | 2000  | SMPN          | 14.48         | 22.5          | 34.41          | 24.64          | 24.55       | 30.32       |
| 10    | 10000 | General       | 57.15         | 75.56         | 61.32          | 57.8           | 22.77       | 28.1        |
| 10    | 10000 | MPN           | 4.05          | 5.06          | 7.05           | 7.25           | 25.58       | 27.03       |
| 10    | 10000 | SMPN          | 13.05         | 17.43         | 29.71          | 16.35          | 21.51       | 24.94       |
| 20    | 500   | General       | 53.15         | 79.67         | 54.1           | 64.91          | 31.33       | 45.81       |
| 20    | 500   | MPN           | 14.07         | 24.46         | 33.87          | 35.83          | 37.61       | 40.13       |
| 20    | 500   | SMPN          | 18.37         | 34.32         | 34.04          | 29.12          | 32.79       | 33.08       |
| 20    | 2000  | General       | 52.79         | 77.06         | 55.05          | 55.68          | 27.85       | 36.06       |
| 20    | 2000  | MPN           | 4.38          | 8.55          | 24.81          | 21.03          | 30.3        | 27.4        |
| 20    | 2000  | SMPN          | 13.69         | 21.97         | 28.45          | 17.69          | 25.87       | 23.45       |
| 20    | 10000 | General       | 53.63         | 75.47         | 55.53          | 49.39          | 29.29       | 33.64       |
| 20    | 10000 | MPN           | 3.82          | 4.64          | 18.86          | 13.59          | 22.32       | 18.9        |
| 20    | 10000 | SMPN          | 9.92          | 14.53         | 26.49          | 12.87          | 21.62       | 17.64       |
| 30    | 500   | General       | 49.36         | 78.31         | 55.35          | 60.17          | 35.28       | 44.29       |
| 30    | 500   | MPN           | 18.57         | 25.47         | 40.47          | 38.12          | 41.78       | 39.35       |
| 30    | 500   | SMPN          | 37.1          | 30.44         | 15.73          | 30.2           | 35.6        | 32.7        |
| 30    | 2000  | General       | 53.99         | 77.01         | 56.25          | 53.87          | 28.2        | 32.76       |
| 30    | 2000  | MPN           | 8.97          | 10.36         | 34.51          | 26.69          | 36.02       | 28.71       |
| 30    | 2000  | SMPN          | 34.01         | 22.76         | 11.24          | 18.43          | 32.21       | 26          |
| 30    | 10000 | General       | 52.74         | 75.04         | 55.19          | 49.69          | 32.97       | 34.13       |
| 30    | 10000 | MPN           | 8.11          | 7.49          | 36.72          | 26.41          | 39.35       | 29.41       |
| 30    | 10000 | SMPN          | 36.9          | 23.96         | 8.82           | 11.71          | 31.04       | 23.62       |

Table S 4: False positive and false negative values for synthetic data with  $k = 3$

<sup>a</sup> Vertex number

<sup>b</sup> Sample size

<sup>c</sup> Type of generator

<sup>d</sup> Value of  $FDR$  from the MPN variation of DiProg

<sup>e</sup> Value of  $FNR$  from the MPN variation of DiProg

<sup>f</sup> Value of  $FDR$  from the SMPN variation of DiProg

<sup>g</sup> Value of  $FNR$  from the SMPN variation of DiProg

<sup>h</sup> Value of  $FDR$  from the General variation of DiProg

<sup>i</sup> Value of  $FNR$  from the General variation of DiProg
