# Supplementary material for: Learning Oncogenetic Networks by Reducing to Mixed Integer Linear Programming
Source: PubMed Central journal article supplement (PMC3683041; doi:10.1371/journal.pone.0065773), 2013-06-14
Supplement: pone.0065773.s007.pdf [file pone.0065773.s007.pdf]

| $k^a$ | $\varepsilon^b$ | <b>BE%</b> <sup>c</sup> | <b>BIC score</b> <sup>d</sup> |
|-------|-----------------|-------------------------|-------------------------------|
| 2     | 0.05            | 22.727                  | -5398.130                     |
| 2     | 0.10            | 22.727                  | -5269.224                     |
| 2     | 0.20            | 18.182                  | -5200.271                     |
| 2     | 0.30            | 22.727                  | -5197.827                     |
| 3     | 0.05            | 22.727                  | -5398.130                     |
| 3     | 0.10            | 20.000                  | -5264.613                     |
| 3     | 0.20            | 30.000                  | -5154.744                     |
| 3     | 0.30            | 30.303                  | -5135.192                     |
| 4     | 0.05            | 22.727                  | -5398.130                     |
| 4     | 0.10            | 20.000                  | -5264.613                     |
| 4     | 0.20            | 20.690                  | -5168.981                     |
| 4     | 0.30            | 39.394                  | -5139.866                     |

Table S 5: Percentage of bad edges and the BIC scores of the MPNs learned from the BC data in [13] with DiProg

<sup>a</sup> Maximum number of vertices in each hyperedge

<sup>b</sup> Value of  $\varepsilon$  in MPN learning

<sup>c</sup> Percentage of bad edges.

<sup>d</sup> The BIC score of the learned MPN by DiProg.
