# Supplementary material for: Learning Oncogenetic Networks by Reducing to Mixed Integer Linear Programming
Source: PubMed Central journal article supplement (PMC3683041; doi:10.1371/journal.pone.0065773), 2013-06-14
Supplement: pone.0065773.s008.pdf [file pone.0065773.s008.pdf]

| $k^a$ | $\varepsilon^b$ | BE% <sup>c</sup> | BIC score <sup>d</sup> |
|-------|-----------------|------------------|------------------------|
| 3     | 0.05            | 36.111           | -5213.594              |
| 3     | 0.10            | 29.730           | -5147.824              |
| 3     | 0.20            | 34.211           | -5120.994              |
| 3     | 0.30            | 35.135           | -5120.670              |
| 4     | 0.05            | 30.000           | -5215.807              |
| 4     | 0.10            | 32.500           | -5155.409              |
| 4     | 0.20            | 38.462           | -5125.019              |
| 4     | 0.30            | 39.024           | -5120.280              |

Table S 6: Percentage of bad edges and the BIC scores of the SMPNs learned from the BC data in [13] with DiProg algorithm

<sup>a</sup> Maximum number of vertices in each hyperedge

<sup>b</sup> Value of  $\varepsilon$  in SMPN learning

<sup>c</sup> Percentage of bad edges.

<sup>d</sup> The BIC score of the learned SMPN by DiProg.
