# Supplementary material for: Learning Oncogenetic Networks by Reducing to Mixed Integer Linear Programming
Source: PubMed Central journal article supplement (PMC3683041; doi:10.1371/journal.pone.0065773), 2013-06-14
Supplement: pone.0065773.s009.pdf [file pone.0065773.s009.pdf]

| $k^a$ | $\varepsilon^b$ | <b>BE%</b> <sup>c</sup> | <b>BIC score</b> <sup>d</sup> |
|-------|-----------------|-------------------------|-------------------------------|
| 2     | NA              | 22.727                  | -5197.827                     |
| 3     | NA              | 32.432                  | -5120.670                     |
| 4     | NA              | 40.000                  | -5126.657                     |

Table S 7: Percentage of bad edges and the BIC scores of the General BNs learned from the BC data in [13] with DiProg algorithm

<sup>a</sup> Maximum number of vertices in each hyperedge

<sup>b</sup> Value of  $\varepsilon$

<sup>c</sup> Percentage of bad edges.

<sup>d</sup> The BIC score of the learned General BNs by DiProg.
