# Supplementary material for: Learning Oncogenetic Networks by Reducing to Mixed Integer Linear Programming
Source: PubMed Central journal article supplement (PMC3683041; doi:10.1371/journal.pone.0065773), 2013-06-14
Supplement: pone.0065773.s010.pdf [file pone.0065773.s010.pdf]

| $k^a$ | $\varepsilon^b$ | <b>BIC score</b> $c$ |
|-------|-----------------|----------------------|
| 2     | 0.05            | -7869.314            |
| 2     | 0.1             | -7767.491            |
| 2     | 0.2             | -7759.997            |
| 2     | 0.3             | -7729.563            |
| 3     | 0.05            | -7868.416            |
| 3     | 0.1             | -7735.850            |
| 3     | 0.2             | -7620.549            |
| 3     | 0.3             | -7562.661            |
| 4     | 0.05            | -7868.416            |
| 4     | 0.1             | -7735.850            |
| 4     | 0.2             | -7687.373            |
| 4     | 0.3             | -7623.140            |

Table S 8: The BIC scores of the MPNs learned from the RCC data in [11] with DiProg algorithm. As explained in Text S1 of the supplementary material the best value for  $\varepsilon$  that gives the biologically sound PNs is 0.2. For  $\varepsilon = 0.2$  the learned MPN with  $k = 3$  has the largest BIC score.

<sup>a</sup> Maximum number of vertices in hyperedges

<sup>b</sup> Value of  $\varepsilon$

<sup>c</sup> The BIC score of the learned General BNs by DiProg.
