# Supplementary material for: Learning Oncogenetic Networks by Reducing to Mixed Integer Linear Programming
Source: PubMed Central journal article supplement (PMC3683041; doi:10.1371/journal.pone.0065773), 2013-06-14
Supplement: pone.0065773.s012.pdf [file pone.0065773.s012.pdf]

### Text S2. Comparing the DiProg with the H-CBN algorithm

Supplementary Table S9 contains the BIC scores for the MPNs that are learned by the DiProg from the RCC data in [10]. Again, we compare the BIC scores of the learned MPNs with  $\varepsilon = 0.2$ . The BIC scores for  $k = 3$  and  $k = 4$  are equal and both larger than the BIC score for  $k = 2$ . An inspection of the learned MPNs showed that the structures of the learned MPNs with  $k = 3$  and  $k = 4$  are exactly similar. We pick the learned MPN corresponding to  $\varepsilon = 0.2$  and  $k = 3$  or 4 as the best model. Figure 5 in the paper shows the learned MPN with the chosen parameters.

| $k^a$ | $\varepsilon^b$ | BIC score <sup>c</sup> |
|-------|-----------------|------------------------|
| 2     | 0.05            | -1352.261              |
| 2     | 0.1             | -1317.717              |
| 2     | 0.2             | -1308.193              |
| 2     | 0.3             | -1308.193              |
| 3     | 0.05            | -1352.261              |
| 3     | 0.1             | -1317.717              |
| 3     | 0.2             | -1306.452              |
| 3     | 0.3             | -1303.916              |
| 4     | 0.05            | -1352.261              |
| 4     | 0.1             | -1317.717              |
| 4     | 0.2             | -1306.452              |
| 4     | 0.3             | -1303.916              |

Table S 9: The BIC scores of the MPNs learned from the RCC data in [10] with DiProg algorithm

<sup>a</sup> Maximum number of vertices in hyperedges

<sup>b</sup> Value of  $\varepsilon$

<sup>c</sup> The BIC score of the learned General BNs by DiProg.
